# Supplementary material for: BloodSpot 3.0: a database of gene and protein expression data in normal and malignant haematopoiesis
Source: PubMed Central journal article supplement — Nucleic Acids Res. 2023 Nov 2;52(D1):D1138–42. doi: 10.1093/nar/gkad993 (PMC10768446; doi:10.1093/nar/gkad993), 2023-11-02
Supplement: gkad993_supplemental_file.pdf [file gkad993_supplemental_file.pdf]

Supplementary table 1:

An overview over added datasets since last release, their main reference, and the source of the data.

| Dataset name                              | Published in                                                                                                                                                | Data source                                                                                                                                                                                                                                                                                                                                                                                                                                                         |
|-------------------------------------------|-------------------------------------------------------------------------------------------------------------------------------------------------------------|---------------------------------------------------------------------------------------------------------------------------------------------------------------------------------------------------------------------------------------------------------------------------------------------------------------------------------------------------------------------------------------------------------------------------------------------------------------------|
| Human sorted single cell<br>(Pellin 2019) | A comprehensive single cell transcriptional landscape of human hematopoietic progenitors<br><br>(Pellin et al. 2019)                                        | GSE117498<br><br><a href="https://www.ncbi.nlm.nih.gov/geo/query/acc.cgi?acc=GSE117498">https://www.ncbi.nlm.nih.gov/geo/query/acc.cgi?acc=GSE117498</a>                                                                                                                                                                                                                                                                                                            |
| LEUKEGENE                                 | The transcriptomic landscape and directed chemical interrogation of MLL-rearranged acute myeloid leukemias<br><br>(Lavallée et al. 2015)                    | GSE62190<br><a href="https://www.ncbi.nlm.nih.gov/geo/query/acc.cgi?acc=GSE62190">https://www.ncbi.nlm.nih.gov/geo/query/acc.cgi?acc=GSE62190</a><br><br>GSE66917<br><a href="https://www.ncbi.nlm.nih.gov/geo/query/acc.cgi?acc=GSE66917">https://www.ncbi.nlm.nih.gov/geo/query/acc.cgi?acc=GSE66917</a><br><br>GSE67039<br><a href="https://www.ncbi.nlm.nih.gov/geo/query/acc.cgi?acc=GSE67039">https://www.ncbi.nlm.nih.gov/geo/query/acc.cgi?acc=GSE67039</a> |
| AML by karyotype                          | Prognostically Useful Gene-Expression Profiles in Acute Myeloid Leukemia<br><br>(Valk et al. 2004)                                                          | GSE1159<br><a href="https://www.ncbi.nlm.nih.gov/geo/query/acc.cgi?acc=GSE1159">https://www.ncbi.nlm.nih.gov/geo/query/acc.cgi?acc=GSE1159</a>                                                                                                                                                                                                                                                                                                                      |
| TARGET study                              | Genomic Profiling of Pediatric Acute Myeloid Leukemia Reveals a Changing Mutational Landscape from Disease Diagnosis to Relapse<br><br>(Farrar et al. 2016) | <a href="https://qdc.cancer.gov/">https://qdc.cancer.gov/</a>                                                                                                                                                                                                                                                                                                                                                                                                       |

|                                                            |                                                                                                                 |                                                                                                                                                                                                                                                                                                         |
|------------------------------------------------------------|-----------------------------------------------------------------------------------------------------------------|---------------------------------------------------------------------------------------------------------------------------------------------------------------------------------------------------------------------------------------------------------------------------------------------------------|
| Beat AML                                                   | Functional genomic landscape of acute myeloid leukaemia<br><br>(Tyner et al. 2018)                              | <a href="https://gdc.cancer.gov/">https://gdc.cancer.gov/</a>                                                                                                                                                                                                                                           |
| Total AML proteome<br><br>Enriched population AML proteome | Quantitative single-cell proteomics as a tool to characterize cellular hierarchies.<br><br>(Schoof et al. 2021) | Inhouse and available at:<br><br><a href="http://proteomecentral.proteomexchange.org/cgi/GetDataset?ID=PXD020586">http://proteomecentral.proteomexchange.org/cgi/GetDataset?ID=PXD020586</a>                                                                                                            |
| Age stratified AML                                         | Genomic subtyping and therapeutic targeting of acute erythroleukemia.<br>(Iacobucci et al. 2019)                | Kindly supplied from the authors and also available at:<br><a href="https://pecan.stjude.cloud/proteinpaint/study/ael">https://pecan.stjude.cloud/proteinpaint/study/ael</a><br><br><a href="https://www.ebi.ac.uk/ega/datasets/EGAD00001003412">https://www.ebi.ac.uk/ega/datasets/EGAD00001003412</a> |

- Farrar, Jason E., Heather L. Schuback, Rhonda E. Ries, Daniel Wai, Oliver A. Hampton, Lisa R. Trevino, Todd A. Alonzo, et al. 2016. "Genomic Profiling of Pediatric Acute Myeloid Leukemia Reveals a Changing Mutational Landscape from Disease Diagnosis to Relapse." *Cancer Research* 76 (8): 2197–2205.
- Iacobucci, Ilaria, Ji Wen, Manja Meggendorfer, John K. Choi, Lei Shi, Stanley B. Pounds, Catherine L. Carmichael, et al. 2019. "Genomic Subtyping and Therapeutic Targeting of Acute Erythroleukemia." *Nature Genetics* 51 (4): 694–704.
- Lavallée, Vincent-Philippe, Irène Baccelli, Jana Krosł, Brian Wilhelm, Frédéric Barabé, Patrick Gendron, Geneviève Boucher, et al. 2015. "The Transcriptomic Landscape and Directed Chemical Interrogation of MLL-Rearranged Acute Myeloid Leukemias." *Nature Genetics* 47 (9): 1030–37.
- Pellin, Danilo, Mariana Loperfido, Cristina Baricordi, Samuel L. Wolock, Annita Montepeloso, Olga K. Weinberg, Alessandra Biffi, Allon M. Klein, and Luca Biasco. 2019. "A Comprehensive Single Cell Transcriptional Landscape of Human Hematopoietic Progenitors." *Nature Communications* 10 (1): 1–15.
- Schoof, Erwin M., Benjamin Furtwängler, Nil Üresin, Nicolas Rapin, Simonas Savickas, Coline Gentil, Eric Lechman, Ulrich Auf Dem Keller, John E. Dick, and Bo T. Porse. 2021. "Quantitative Single-Cell Proteomics as a Tool to Characterize Cellular Hierarchies." *Nature Communications* 12 (1): 3341.
- Tyner, Jeffrey W., Cristina E. Tognon, Daniel Bottomly, Beth Wilmot, Stephen E. Kurtz, Samantha L. Savage, Nicola Long, et al. 2018. "Functional Genomic Landscape of Acute Myeloid Leukaemia." *Nature* 562 (7728): 526–31.
- Valk, Peter J. M., Roel G. W. Verhaak, M. Antoinette Beijen, Claudia A. J. Erpelink, Sahar Barjesteh van Waalwijk van Doorn-Khosrovani, Judith M. Boer, H. Berna Beverloo, et al. 2004. "Prognostically Useful Gene-Expression Profiles in Acute Myeloid Leukemia," April. <https://doi.org/10.1056/NEJMoa040465>.
